# Supplementary material for: Purification and Characterization of the RecA Protein from Neisseria gonorrhoeae
Source: PubMed Central journal article supplement (PMC3040777; doi:10.1371/journal.pone.0017101), 2011-02-17

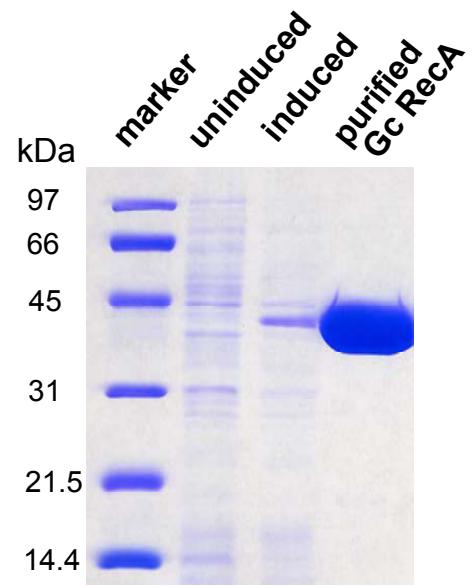

Supplement: pone.0017101.s001.pdf [file pone.0017101.s001.pdf]
