# Supplementary material for: Purification and Characterization of the RecA Protein from Neisseria gonorrhoeae
Source: PubMed Central journal article supplement (PMC3040777; doi:10.1371/journal.pone.0017101), 2011-02-17

***Escherichia coli* SSB and *Neisseria gonorrhoeae* SSB EMSA on ssDNA OCN 324 50mer**

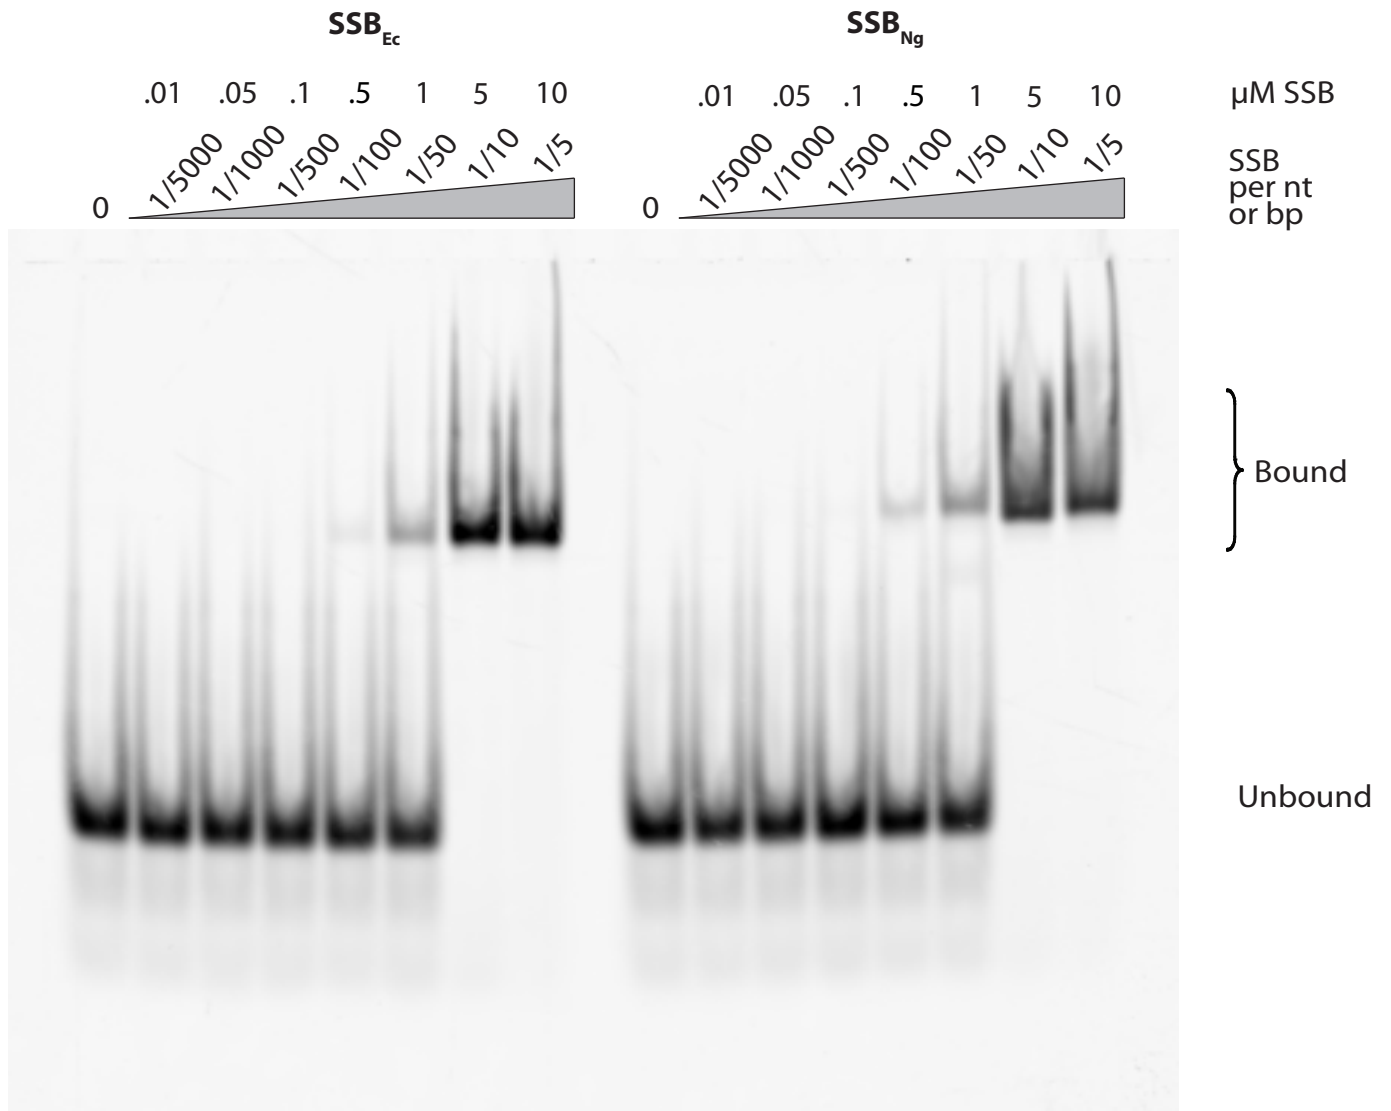

Supplement: pone.0017101.s002.pdf [file pone.0017101.s002.pdf]
